# Supplementary material for: A Qualitative Application of Temporal Self-Regulation Theory to Understand Adherence to Simple and Complex Medication Regimens
Source: Healthcare (Basel). 2020 Nov 16;8(4):487. doi: 10.3390/healthcare8040487 (PMC7711536; doi:10.3390/healthcare8040487)
Supplement: Supplementary file 1 [file healthcare-08-00487-s001.pdf]

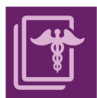

## Supplementary Material

### Interview schedule – Medication adherence

- Interviewer obtains consent to audio-record the interview.
  - Interviewer also re-iterates that the study is voluntary; the participant does not need to answer a question if he/she does not want to, and that he/she can also withdraw at any time without penalty.
  - Rapport will be built prior to asking participant first question.
  - Participant will have to complete consent and demographics on Qualtrics prior to interview
1. Can you begin by telling me about your current medication usage and needs?
    - a. Can you tell me what each of these medications is for and how they are taken?
    - b. Do you have a set routine for taking these?
    - c. Do you find them easy or hard to take?
  2. How do you feel about taking these medications?
    - a. Can you tell me why/why not you think taking medication is important?
    - b. How do your friends and family feel about you taking these medications?
    - c. Can you tell me about your motivations for adhering or not-adhering to your medication?
    - d. What do you think would happen if you didn't take your medication?
    - e. Is there a medication you take that you think is more important than the others?
      - a. Why?
  3. How would you describe your overall adherence to these medications?
    - a. Do you take them as you have been directed by your health professional?
    - b. Sometimes people simply forget to take their medication, do you sometimes experience this?
    - c. People also deliberately sometimes do not take their medication, do you sometimes do this?
      - i. If so, why?
    - d. What are some things that make it easier for you to take your medication?
      - i. Are there any particular things or techniques you have in place to assist you?
    - e. Is there anything that makes it a bit harder? Such as things that get in the way of you taking your medication correctly
      - i. Can you please tell me about them – how influential are they?
      - ii. Is there anything that could be improved that would change this? E.g. cost of medication
      - iii. What do you think would assist you in improving your adherence?
  4. What is your experience of side-effects from medication?
    - a. Please elaborate – type, number, when
    - b. Did this influence your views/motivations for taking medication?

c. Did it influence your adherence? How?

5. 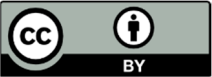 © 2020 by the authors. Submitted for possible open access publication under the terms and conditions of the Creative Commons Attribution (CC BY) license (<http://creativecommons.org/licenses/by/4.0/>).
